# Supplementary material for: Inulin mitigated antibiotic-induced intestinal microbiota dysbiosis – a comparison of different supplementation stages
Source: Royal Society of Chemistry journal article supplement (doi:10.1039/d3fo05186b), 2024-01-01
Supplement: d3fo05186b1.pdf [file d3fo05186b1.pdf]

**Supplementary 1: AIN-93G mineral mix**

Calcium Carbonate 35.7%, Monopotassium Phosphate 19.6%, Potassium Citrate Monohydrate 7.078%, Sodium Chloride 7.4%, Potassium Sulfate 4.66%, Magnesium Oxide 2.4%, Ferric Citrate 0.606%, Zinc Carbonate 0.165%, Manganese Carbonate 0.063%, Copper Carbonate 0.03%, Potassium Iodate 0.001%, Sodium Selenate, Anhydrous 0.00103%, Ammonium Molybdate.4H<sub>2</sub>O 0.000795%, Sodium Metasilicate.9H<sub>2</sub>O 0.145%, Chromium Potassium Sulfate.12H<sub>2</sub>O 0.0275%, Lithium Chloride 0.00174%, Boric Acid 0.008145%, Sodium Fluoride 0.00635%, Nickel Carbonate 0.00318%, Ammonium Vanadate 0.00066%, Powdered Sugar 22.1%.

Figure S1. Mice body weight changes over the study period.
