# Supplementary material for: Inulin mitigated antibiotic-induced intestinal microbiota dysbiosis – a comparison of different supplementation stages
Source: Royal Society of Chemistry journal article supplement (doi:10.1039/d3fo05186b), 2024-01-01
Supplement: d3fo05186b4.xlsx [file d3fo05186b4.xlsx]

## Sheet: g4.dif.taxa
	inulin effect	inulin + ABX effect	end taxationdiffer from day0
d__Bacteria _Firmicutes _Clostridia _Peptostreptococcales-Tissierellales _Peptostreptococcaceae _Romboutsia	0.0435888	0.0253298	0.0233701
d__Bacteria _Firmicutes _Clostridia _Oscillospirales _Ruminococcaceae _Anaerotruncus	0.0435888	0.0253298	0.0233701
d__Bacteria _Firmicutes _Clostridia _Oscillospirales _Oscillospiraceae _uncultured	0.0435888	0.0253298	0.0233701
d__Bacteria _Firmicutes _Clostridia _Oscillospirales _Ruminococcaceae _Incertae_Sedis	0.0435888	0.0253298	0.0233701
d__Bacteria _Firmicutes _Clostridia _Clostridiales _Clostridiaceae _Clostridium_sensu_stricto_1	0.0435888	0.0253298	0.0233701
d__Bacteria _Actinobacteriota _Coriobacteriia _Coriobacteriales _Eggerthellaceae _Eggerthella	0.0435888	0.0253298	0.0233701
d__Bacteria _Firmicutes _Bacilli _Erysipelotrichales _Erysipelotrichaceae _Turicibacter	0.0435888	0.0253298	0.0233701
d__Bacteria _Firmicutes _Clostridia _Lachnospirales _Lachnospiraceae _Blautia	0.0435888	0.0253298	0.0233701
d__Bacteria _Firmicutes _Clostridia _Lachnospirales _Lachnospiraceae _unclassified_Lachnospiraceae	0.0435888	0.0253298	0.0233701
d__Bacteria _Firmicutes _Clostridia _Lachnospirales _Lachnospiraceae _Lachnospiraceae_NK4A136_group	0.0435888	0.0253298	0.0233701
d__Bacteria _Firmicutes _Clostridia _Lachnospirales _Lachnospiraceae _Marvinbryantia	0.0435888	0.0253298	0.0233701
d__Bacteria _Firmicutes _Clostridia _Oscillospirales _Ruminococcaceae _uncultured	0.0525794	0.0253298	0.0233701
d__Bacteria _Firmicutes _Clostridia _Clostridia_UCG-014 _Clostridia_UCG-014 _Clostridia_UCG-014	0.0525794	0.0253298	0.0233701
d__Bacteria _Firmicutes _Clostridia _Lachnospirales _Lachnospiraceae _Dorea	0.0525794	0.0253298	0.0233701
d__Bacteria _Firmicutes _Clostridia _Oscillospirales _Oscillospiraceae _Colidextribacter	0.0820751	0.0253298	0.0233701
d__Bacteria _Firmicutes _Clostridia _Peptococcales _Peptococcaceae _uncultured	0.0820751	0.0253298	0.0233701
d__Bacteria _Firmicutes _Clostridia _Lachnospirales _Lachnospiraceae _Frisingicoccus	0.0820751	0.0253298	0.0233701
d__Bacteria _Firmicutes _Clostridia _Lachnospirales _Lachnospiraceae _Lachnoclostridium	0.130864	0.0253298	0.0233701
d__Bacteria _Firmicutes _Clostridia _Oscillospirales _Oscillospiraceae _Oscillibacter	0.210317	0.0253298	0.0233701
d__Bacteria _Firmicutes _Clostridia _Lachnospirales _Lachnospiraceae _Roseburia	0.210317	0.0253298	0.0233701
d__Bacteria _Firmicutes _Bacilli _Erysipelotrichales _Erysipelotrichaceae _Faecalitalea	0.313414	0.0253298	0.0233701
d__Bacteria _Firmicutes _Clostridia _Lachnospirales _Lachnospiraceae _Lachnospiraceae_UCG-006	0.313414	0.0253298	0.0233701
d__Bacteria _Firmicutes _Bacilli _Lactobacillales _Enterococcaceae _Enterococcus	0.420635	0.0253298	0.0233701
d__Bacteria _Proteobacteria _Gammaproteobacteria _Enterobacterales _Morganellaceae _Proteus	0.534683	0.0253298	0.0233701
d__Bacteria _Firmicutes _Clostridia _Lachnospirales _Lachnospiraceae _uncultured	0.534683	0.0253298	0.0233701
d__Bacteria _Firmicutes _Clostridia _Oscillospirales _[Eubacterium]_coprostanoligenes_group _[Eubacterium]_coprostanoligenes_group	0.786994	0.0253298	0.0233701
d__Bacteria _Firmicutes _Clostridia _Lachnospirales _Lachnospiraceae _GCA-900066575	0.786994	0.0253298	0.0233701
d__Bacteria _Firmicutes _Clostridia _Lachnospirales _Defluviitaleaceae _Defluviitaleaceae_UCG-011	0.900754	0.0253298	0.0233701
d__Bacteria _Proteobacteria _Gammaproteobacteria _Enterobacterales _Enterobacteriaceae _unclassified_Enterobacteriaceae	1	0.0253298	0.0233701
d__Bacteria _Firmicutes _Clostridia _Christensenellales _Christensenellaceae _Christensenellaceae_R-7_group	0.130864	0.0541992	0.0233701
d__Bacteria _Firmicutes _Clostridia _Oscillospirales _Oscillospiraceae _NK4A214_group	0.786994	0.0541992	0.0233701
d__Bacteria _Firmicutes _Clostridia _Oscillospirales _Oscillospiraceae _Intestinimonas	0.900754	0.0541992	0.0233701
d__Bacteria _Firmicutes _Clostridia _Oscillospirales _Oscillospiraceae _unclassified_Oscillospiraceae	0.0435888	0.141011	0.0233701
d__Bacteria _Firmicutes _Clostridia _Lachnospirales _Lachnospiraceae _Lachnospiraceae_UCG-004	0.0435888	0.141011	0.0233701
d__Bacteria _Firmicutes _Clostridia _Oscillospirales _UCG-010 _UCG-010	0.637951	0.141011	0.0233701
d__Bacteria _Firmicutes _Bacilli _Erysipelotrichales _Erysipelotrichaceae _uncultured	0.0435888	0.162428	0.0233701
d__Bacteria _Firmicutes _Clostridia _Monoglobales _Monoglobaceae _Monoglobus	0.300243	0.276934	0.0233701
d__Bacteria _Firmicutes _Clostridia _Oscillospirales _Butyricicoccaceae _Butyricicoccus	0.0435888	0.442542	0.0233701
d__Bacteria _Firmicutes _Clostridia _Christensenellales _Christensenellaceae _uncultured	0.0435888	0.442542	0.0233701
d__Bacteria _Firmicutes _Clostridia _Lachnospirales _Lachnospiraceae _Tuzzerella	0.0435888	0.442542	0.0233701
d__Bacteria _Firmicutes _Clostridia _Peptostreptococcales-Tissierellales _Anaerovoracaceae _[Eubacterium]_brachy_group	0.0570155	0.442542	0.0233701
d__Bacteria _Firmicutes _Clostridia _Oscillospirales _Ruminococcaceae _Harryflintia	0.0435888	NA	0.0233701
d__Bacteria _Firmicutes _Clostridia _Oscillospirales _Ruminococcaceae _Ruminococcaceae	0.0435888	NA	0.0233701
d__Bacteria _Firmicutes _Clostridia _Lachnospirales _Lachnospiraceae _[Eubacterium]_ventriosum_group	0.0435888	NA	0.0233701
d__Bacteria _Bacteroidota _Bacteroidia _Bacteroidales _Bacteroidaceae _Bacteroides	0.0435888	0.0276049	0.0257152
d__Bacteria _Firmicutes _Bacilli _Lactobacillales _Lactobacillaceae _Lactobacillus	1	0.0276049	0.0257152
d__Bacteria _Firmicutes _Bacilli _Erysipelotrichales _Erysipelatoclostridiaceae _Erysipelatoclostridium	0.0435888	0.0287429	0.0263349
d__Bacteria _unclassified_Bacteria _unclassified_Bacteria _unclassified_Bacteria _unclassified_Bacteria _unclassified_Bacteria	0.900754	0.0373016	0.0263349
d__Bacteria _Firmicutes _Bacilli _Lactobacillales _Lactobacillaceae _Ligilactobacillus	0.0435888	0.336918	0.0343375
d__Bacteria _Firmicutes _Clostridia _Peptostreptococcales-Tissierellales _Anaerovoracaceae _[Eubacterium]_nodatum_group	0.0435888	0.442542	0.0376302
d__Bacteria _Firmicutes _Clostridia _Oscillospirales _Ruminococcaceae _unclassified_Ruminococcaceae	0.110705	0.442542	0.0488946
d__Bacteria _Firmicutes _Clostridia _Lachnospirales _Lachnospiraceae _Acetatifactor	0.110705	0.442542	0.0488946
d__Bacteria _Firmicutes _Clostridia _Oscillospirales _[Clostridium]_methylpentosum_group _[Clostridium]_methylpentosum_group	0.0726812	NA	0.0488946
d__Bacteria _Firmicutes _Clostridia _Christensenellales _Christensenellaceae _unclassified_Christensenellaceae	0.0726812	NA	0.0488946
d__Bacteria _Firmicutes _Clostridia _Lachnospirales _Lachnospiraceae _[Acetivibrio]_ethanolgignens_group	0.0726812	NA	0.0488946
d__Bacteria _Firmicutes _Bacilli _RF39 _RF39 _RF39	0.0820751	0.0253298	0.0850055
d__Bacteria _Firmicutes _Clostridia _Lachnospirales _Lachnospiraceae _Lachnospiraceae_FCS020_group	0.0435888	0.0253298	0.121152
d__Bacteria _Firmicutes _Clostridia _Oscillospirales _Ruminococcaceae _UBA1819	0.0435888	0.0253298	0.247396
d__Bacteria _Firmicutes _Negativicutes _Veillonellales-Selenomonadales _Selenomonadaceae _uncultured	0.0435888	0.0253298	0.247396
d__Bacteria _Firmicutes _Bacilli _Erysipelotrichales _Erysipelotrichaceae _Dielma	0.0623785	0.0253298	0.247396
d__Bacteria _Firmicutes _Clostridia _Oscillospirales _Oscillospiraceae _UCG-005	0.0435888	0.0253298	0.440327
d__Bacteria _Firmicutes _Bacilli _Erysipelotrichales _Erysipelatoclostridiaceae _Candidatus_Stoquefichus	0.0435888	0.0253298	0.618913
